# Supplementary material
Source: MDPI journal article supplement (https://www.mdpi.com/2297-8739/9/5/130)
Supplement: s1 [file s1 › separations-1723713-supplementary.pdf]

## Supporting Information

# Investigation of molecular mean free path, molecular kinetic and molecular polarity affecting Knudsen diffusivity along pore channels

Bin Xu <sup>1,2,3</sup>, Haotian Qin <sup>1</sup>, Lu Chen <sup>1</sup>

<sup>1</sup> State Key Laboratory of Pollution Control and Resource Reuse, College of Environmental Science and Engineering, Tongji University, Shanghai 200092, P.R. China

<sup>2</sup> Shanghai Institute of Pollution Control and Ecological Security, Shanghai 200092, P.R. China

<sup>3</sup> Corresponding author:

E-mail address: [binxu@tongji.edu.cn](mailto:binxu@tongji.edu.cn)

Postal address: Mingjing building 314, Tongji university, 1239 Siping road, Shanghai, China

Phone numbers: +86-021-65981831 ext. 8016

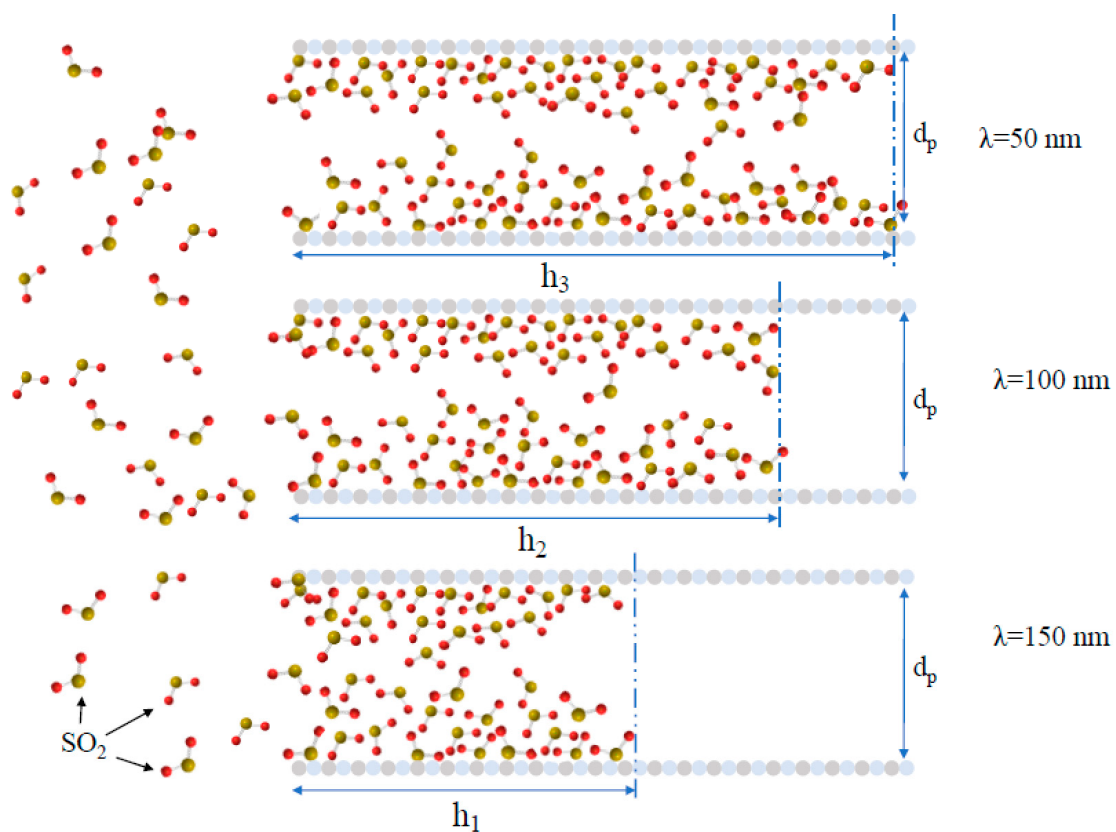

**Figure S1.** Schematic diagram of gas molecular diffusion inside pore channels

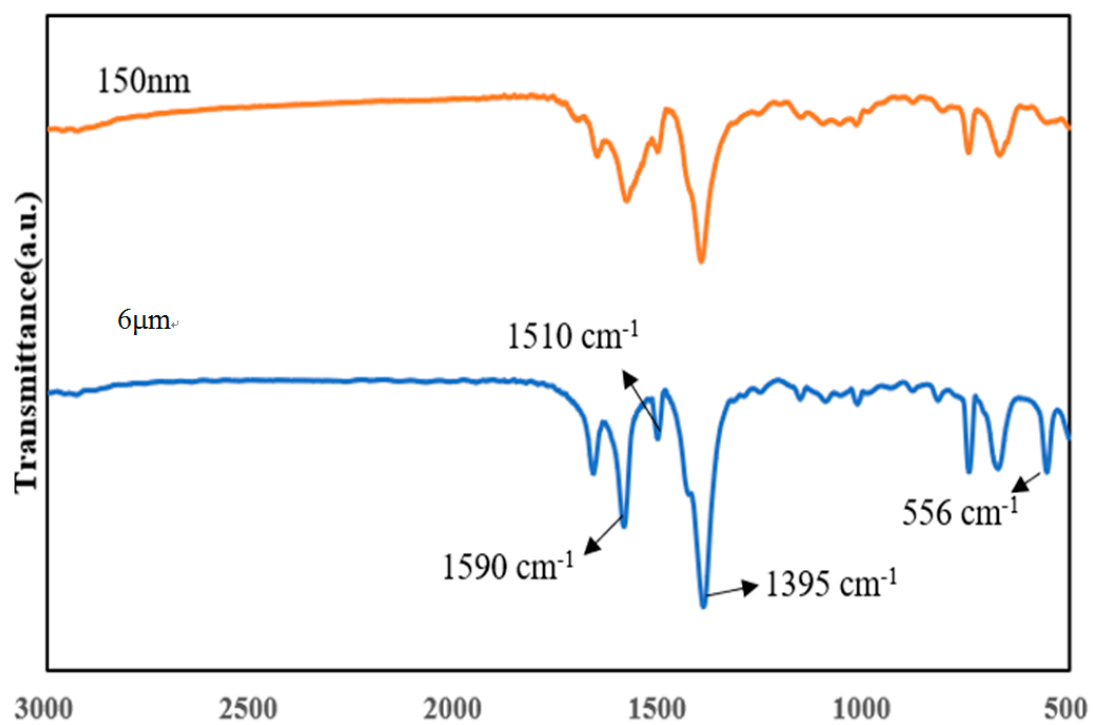

**Figure S2.** FT-IR spectra of UiO-66 at two crystal sizes.

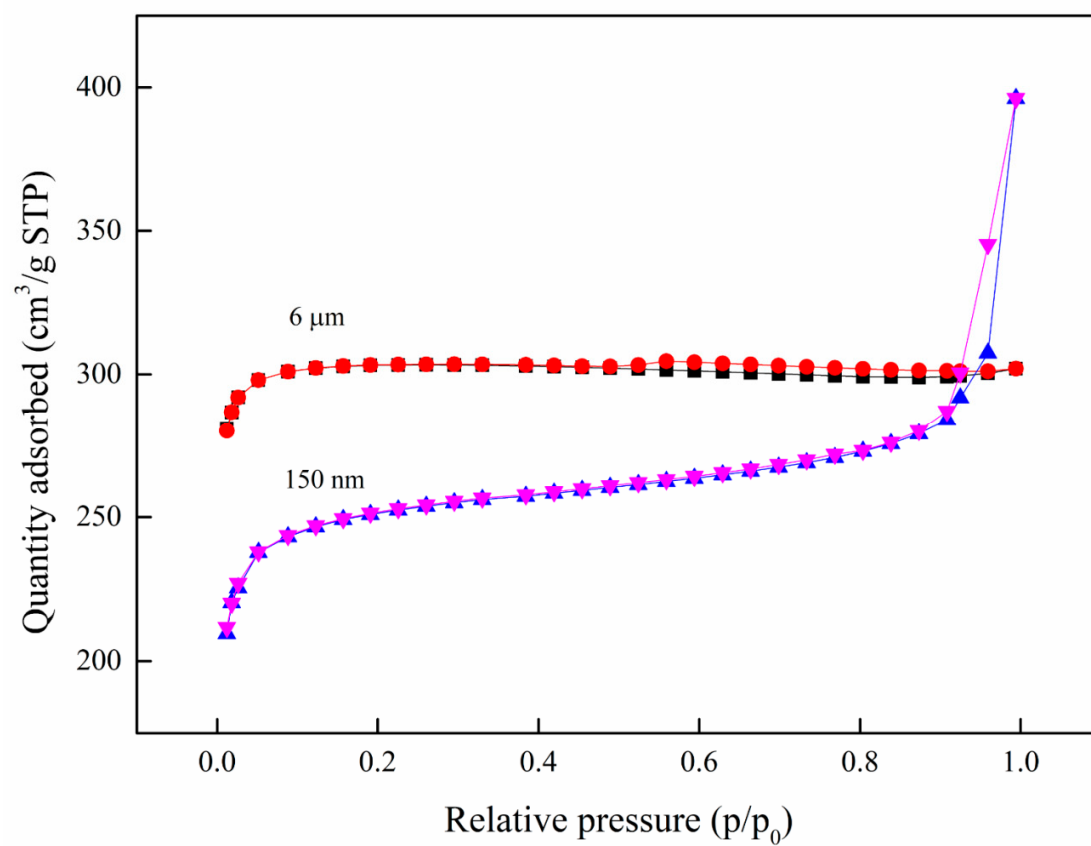

**Figure S3.** N<sub>2</sub> sorption isotherms of UiO-66 with two crystal sizes.
